# Supplementary material
Source: MDPI journal article supplement (https://www.mdpi.com/2076-3417/9/18/3654)

### Supplementary Figure 1

Representative X-Ray powder diffractogram of the studied red mud samples. Abbreviations: ant: anatase; bhm: boehmite; cal: calcite; ccn: cancrinite; dol: dolomite; gbs: gibbsite; gth: goethite; hem: hematite; ilt: illite.

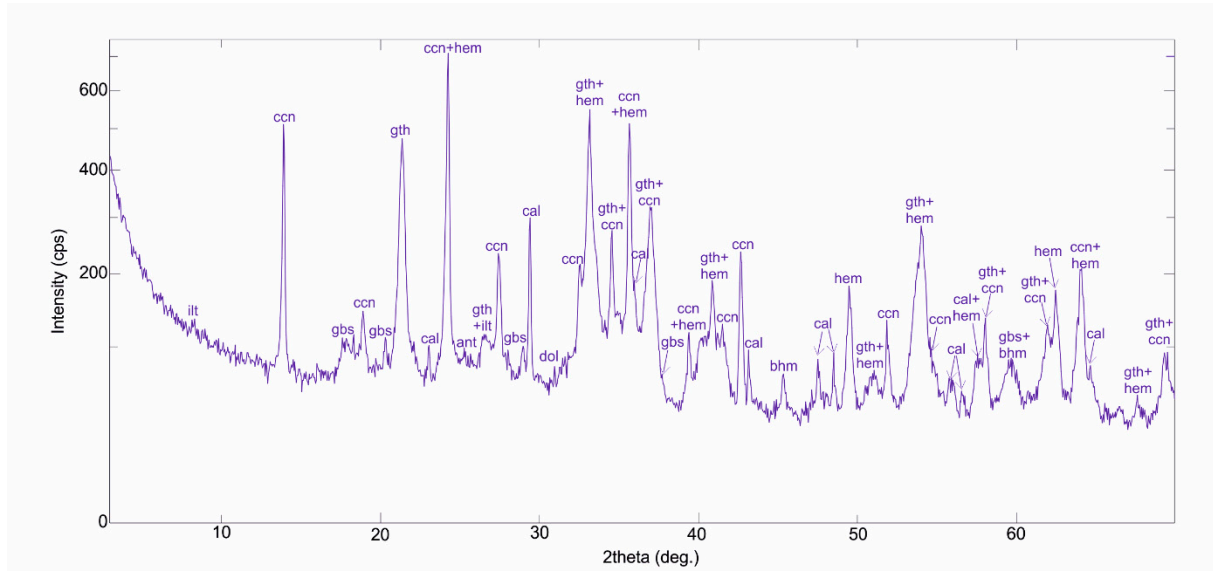

Supplement: s1 [file s1]
